# Supplementary material for: Enhanced thermoelectric performance in topological crystalline insulator n-type Pb0.6Sn0.4Te by simultaneous tuning of the band gap and chemical potential
Source: Royal Society of Chemistry journal article supplement (doi:10.1039/c8ta08731h), 2018-01-01
Supplement: c8ta08731h1.pdf [file c8ta08731h1.pdf]

*Supporting Information (SI)*

**Enhanced thermoelectric performance in topological crystalline insulator  
*n*-type  $\text{Pb}_{0.6}\text{Sn}_{0.4}\text{Te}$  by simultaneous tuning of the band gap and chemical  
potential**

Subhajit Roychowdhury,<sup>†</sup> Moinak Dutta<sup>†</sup> and Kanishka Biswas<sup>†,‡,\*</sup>

<sup>†</sup>*New Chemistry Unit, Jawaharlal Nehru Centre for Advanced Scientific Research (JNCASR),  
Jakkur P.O., Bangalore 560064, India.*

<sup>‡</sup>*School of Advanced Materials and International Centre of Materials Science, Jawaharlal  
Nehru Centre for Advanced Scientific Research (JNCASR), Jakkur P.O., Bangalore 560064,  
India.*

*\*E-mail: kanishka@jncasr.ac.in*

**EXPERIMENTAL DETAILS**

**Reagents.** Tin (Sn, Alfa Aesar 99.99+ %), tellurium (Te, Alfa Aesar 99.999+ %), lead (Pb, Alfa Aesar 99.99+ %) and tellurium iodide ( $\text{TeI}_4$ , Alfa Aesar 99%) were used for synthesis without further purification.

**Synthesis.** Ingots (~6 g) of  $\text{Pb}_{0.60}\text{Sn}_{0.40}\text{Te}_{1-x}\text{I}_x$  ( $x = 0.0, 0.005, 0.01, 0.02, 0.03$ ) were synthesized by mixing stoichiometric ratios of high-purity elemental Sn, Pb, Te and  $\text{TeI}_4$  in quartz tubes. The tubes were sealed under vacuum ( $10^{-5}$  Torr) and slowly heated to 723 K over 12 h (58 K/hr), then heated up to 1323 K in 5 h (120 K/hr), annealed for 5 h (0 K/hr), and cooled down to 1023 K over 2 h (150 K/hr) and annealed for 4 h (0 K/hr), then slowly cool down to room temperature over a period of 18 h (55 K/hr).

In order to achieve homogeneity in the samples without any surface crack or defects, we have taken two step annealing strategies. First, we have given 5 hrs annealing time at 1323 K during synthesis and shaken the tubes several times and secondly, we have given 4

hrs annealing time at 1023 K to get good quality (high density, ~ 97 %) ingot samples. We have executed thermoelectric measurements for all samples as synthesized ingot from melt.

**Powder X-ray diffraction.** Powder X-ray diffraction of ground samples were recorded using a Cu K $_{\alpha}$  ( $\lambda = 1.5406 \text{ \AA}$ ) radiation on a Bruker D8 diffractometer at room temperature.

**Band gap measurement.** To estimate optical band gap of the as synthesized samples diffuse measurement has been done with finely ground powder at room temperature using FT-IR Bruker IFS 66V/S spectrometer in a wave-number range 4000-400  $\text{cm}^{-1}$  with 2  $\text{cm}^{-1}$  resolution and 50 scans. Absorption ( $\alpha/S$ ) data were calculated from reflectance data using Kubelka-Munk equation:  $\alpha/S = (1-R)^2/(2R)$ , where R is the reflectance,  $\alpha$  and S are the absorption and scattering coefficient, respectively. The energy band gaps were obtained from  $\alpha/S$  vs  $E_g$  (eV) plot.

**Electrical transport.** Electrical conductivity and Seebeck coefficients were measured simultaneously under He atmosphere from room temperature to 723 K on a ULVAC-RIKO ZEM-3 instrument. The sample for measurement had a parallelepiped shape with the typical dimensions of  $\sim 2 \times 2 \times 8 \text{ mm}^3$ . The longer direction coincides with the direction in which the thermal conductivity was measured.

**Hall measurement.** For determining the carrier concentrations, Hall measurements were carried out on the rectangular samples in four-contact geometry in a magnetic field of 0.57 T at room-temperature in custom-built equipment developed by Excel Instruments.

**Thermal transport.** Thermal diffusivity, D, was directly measured in the range 300–723 K by using a laser flash diffusivity method in a Netzsch LFA-457 instrument (Figure S4, SI). Coins with ~ 8mm diameter and less than 2 mm thickness were used for the measurements. The temperature dependent heat capacity,  $C_p$ , was derived using a standard sample (pyroceram) in LFA-457. The total thermal conductivity,  $\kappa_{\text{total}}$ , was calculated using the

formula,  $\kappa_{\text{total}} = DC_p\rho$ , where  $\rho$  is the density of the sample. The density of the pellets obtained was in the range ~97% of the theoretical density. Thermal conductivity was measured in the same direction of electronic transport measurement.

**Kelvin probe force microscopy.** To investigate the relative position of the Fermi level, Kelvin probe force microscopy has been done with coins (~ 8 mm diameter and ~1 mm thickness) at room temperature using Bruker's dimension icon atomic force microscopy (AFM) system. A Pt-Ir coated Si cantilever (SCM-PIT-V2 from Bruker) with 25 nm radius was used for KPFM measurement.

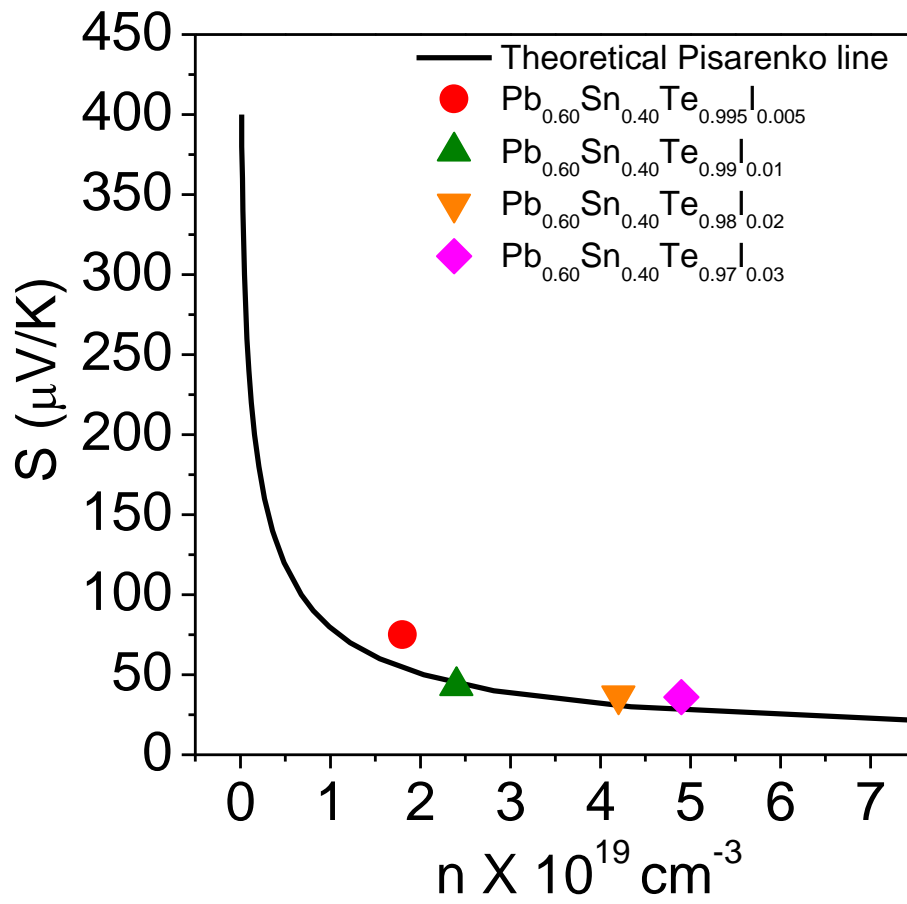

**Figure S1.** Seebeck coefficient ( $S$ ) as a function of carrier concentration ( $n$ ) (Pisarenko plot) at  $T=300 \text{ K}$  for  $\text{Pb}_{0.60}\text{Sn}_{0.40}\text{Te}_{1-x}\text{I}_x$  ( $x = 0.005, 0.01, 0.02$  and  $0.03$ ) samples.

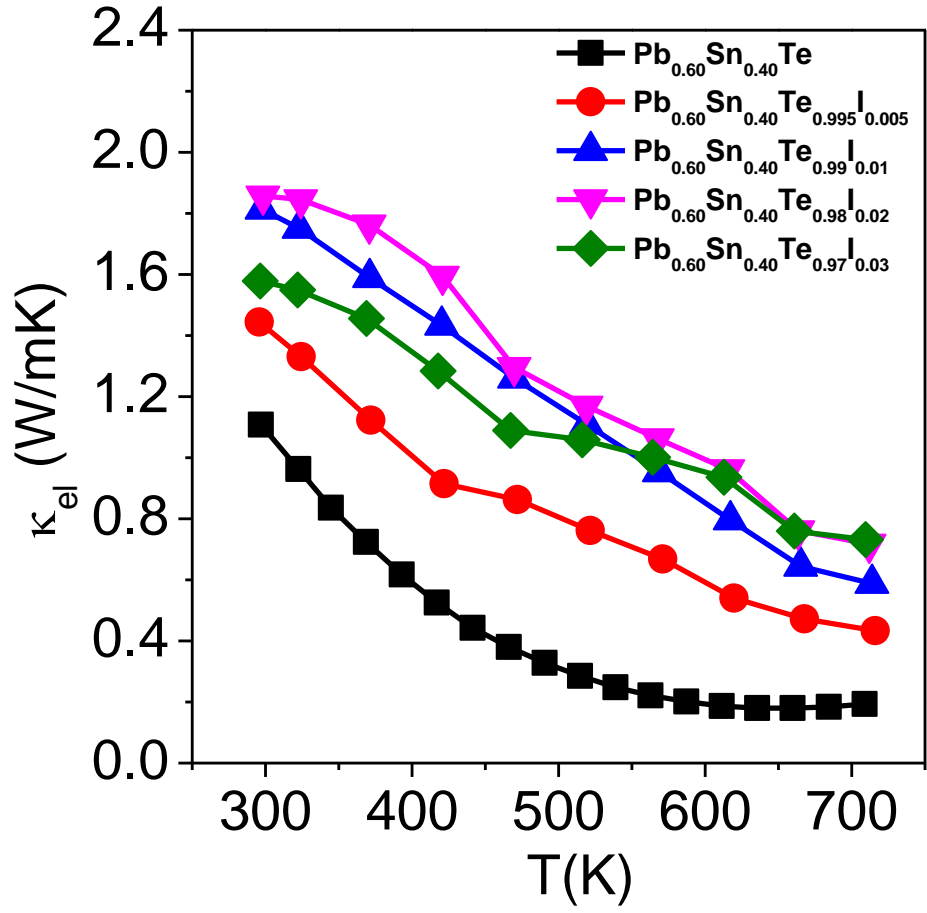

**Figure S2.** Temperature dependent electrical thermal conductivity ( $\kappa_{el}$ ) for  $\text{Pb}_{0.60}\text{Sn}_{0.40}\text{Te}_{1-x}\text{I}_x$  ( $x = 0, 0.005, 0.01, 0.02$  and  $0.03$ ) samples.

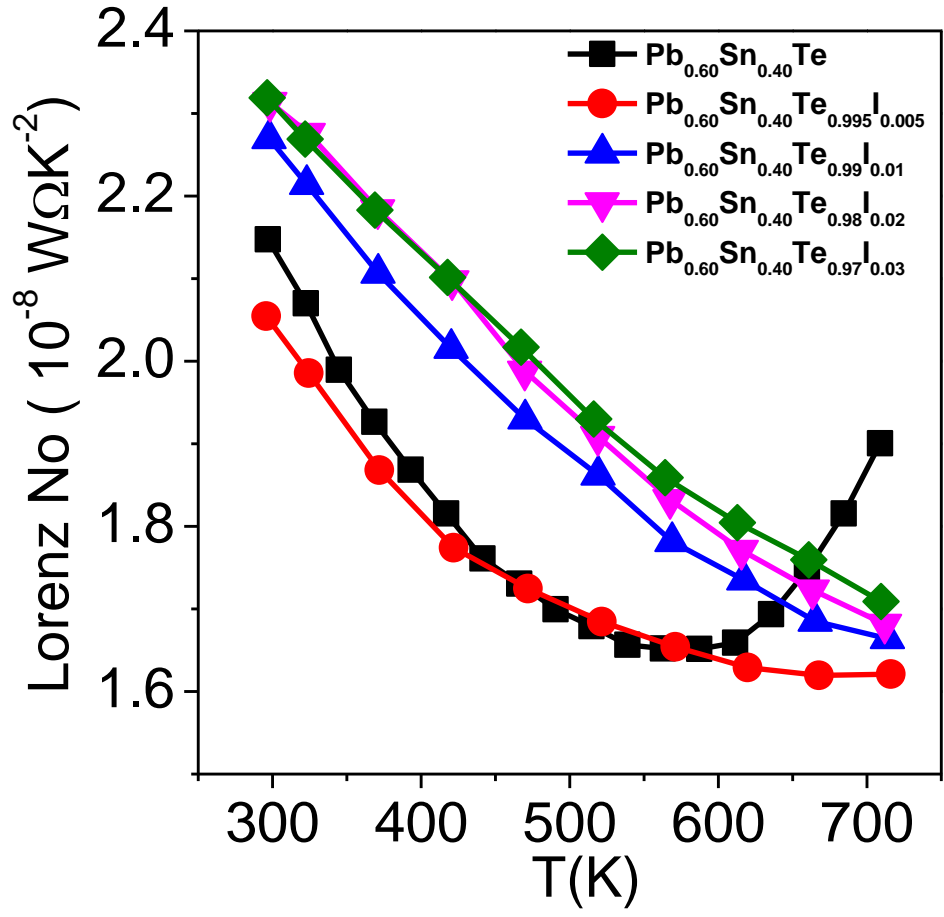

**Figure S3.** Temperature dependent Lorenz number (L) for  $\text{Pb}_{0.60}\text{Sn}_{0.40}\text{Te}_{1-x}\text{I}_x$  ( $x = 0, 0.005, 0.01, 0.02$  and  $0.03$ ) samples.

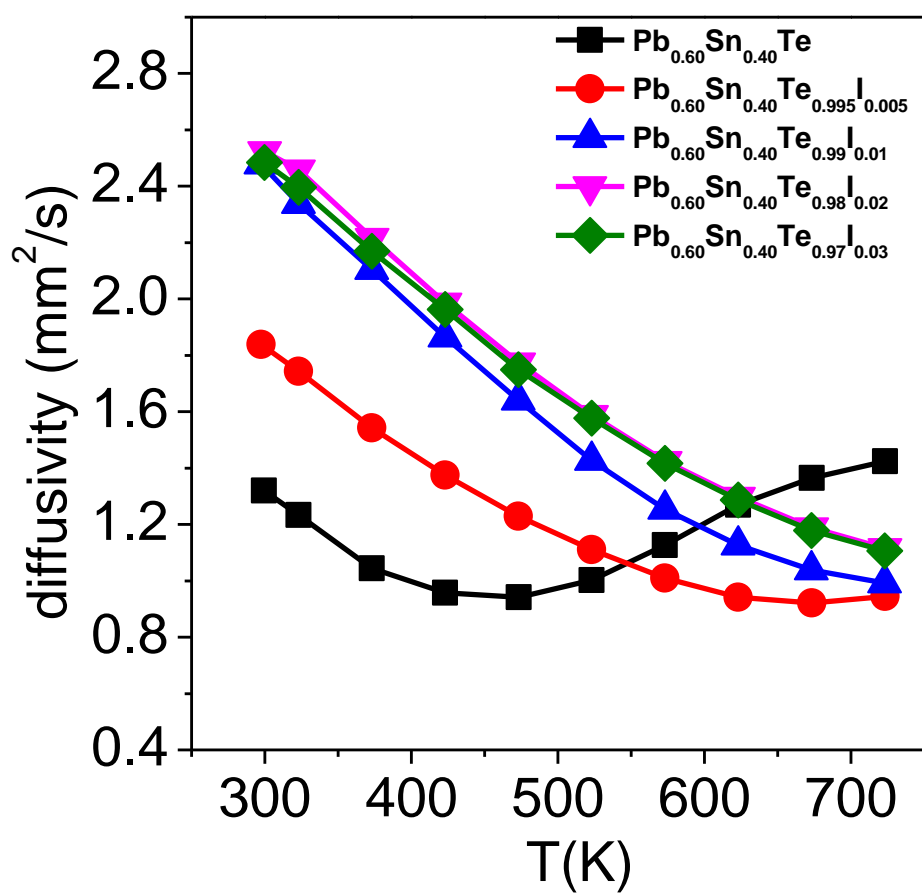

**Figure S4.** Temperature dependent diffusivity (D) for  $\text{Pb}_{0.60}\text{Sn}_{0.40}\text{Te}_{1-x}\text{I}_x$  ( $x = 0, 0.005, 0.01, 0.02$  and  $0.03$ ) samples.

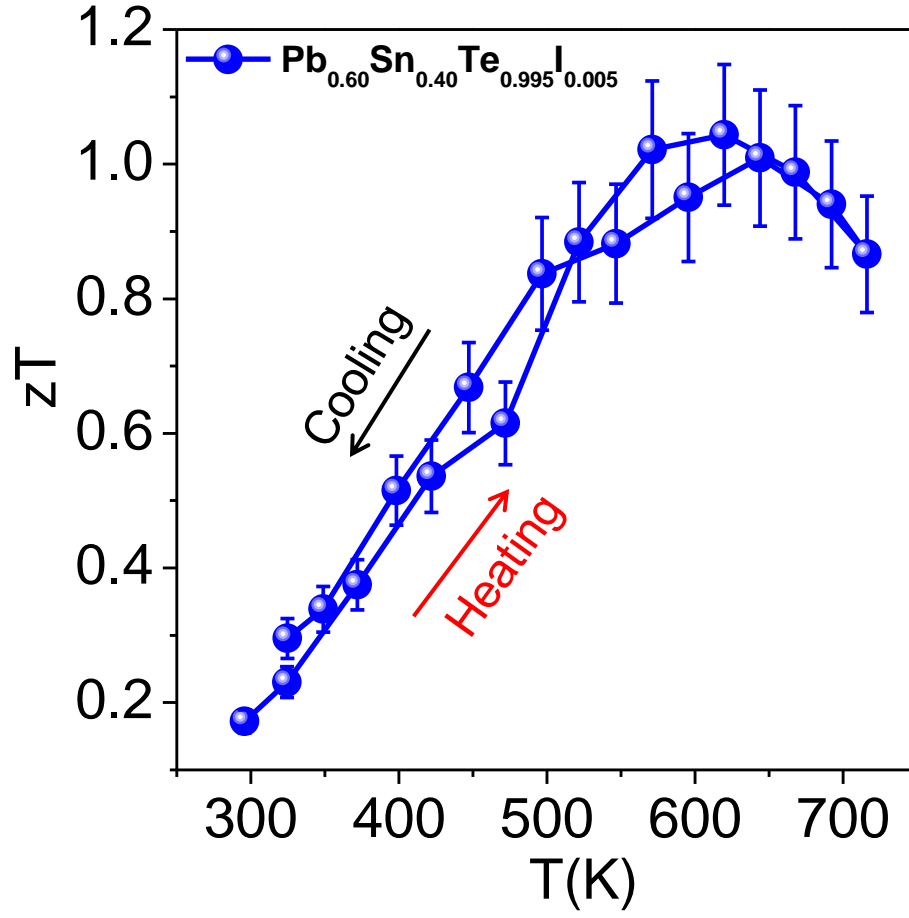

**Figure S5.** Temperature dependent thermoelectric figure of merit of  $\text{Pb}_{0.60}\text{Sn}_{0.40}\text{Te}_{0.995}\text{I}_{0.005}$  sample with 10 % error bar, representing the stability of the sample against high temperature measurements and reproducibility of the measurements.

**Table S1.** Contact potential difference (CPD) of highly ordered pyrolytic graphite (HOPG) and  $\text{Pb}_{0.60}\text{Sn}_{0.40}\text{Te}_{1-x}\text{I}_x$  ( $x = 0, 0.005$  and  $0.02$ ) samples at room temperature.

| Sample                                                                       | CPD <sub>HOPG</sub> (eV) | CPD <sub>Sample</sub> (eV) |
|------------------------------------------------------------------------------|--------------------------|----------------------------|
| <b>Pb<sub>0.60</sub>Sn<sub>0.40</sub>Te</b>                                  | 0.23                     | 0.463                      |
| <b>Pb<sub>0.60</sub>Sn<sub>0.40</sub>Te<sub>0.995</sub>I<sub>0.005</sub></b> | 0.23                     | 0.496                      |
| <b>Pb<sub>0.60</sub>Sn<sub>0.40</sub>Te<sub>0.98</sub>I<sub>0.02</sub></b>   | 0.23                     | 0.514                      |
